# Supplementary material
Source: ML conference proceedings conference paper supplement (https://proceedings.neurips.cc/paper_files/paper/2019/hash/5b970a1d9be0fd100063fd6cd688b73e-Abstract.html)
Supplement: Supplementary file [file 5b970a1d9be0fd100063fd6cd688b73e-Supplemental.zip]

---

# Supplementary

---

Anonymous Author(s)

Affiliation

Address

email

## 1 Comparison of Our Upper Bound with that of Wangni et al. [2]

Wangni et al. [2] also define a sparsity notion (Definition 2). They call a vector a  $X$   $(\rho, k)$ -approximately sparse, if the  $\ell_1$  norm of  $X$  excluding the top  $k$  entries is at most  $\rho$  times the  $\ell_1$  norm of the top  $k$  entries. They show for such a vector, with communication cost roughly  $O(k \log d + k\rho \log d)$  bits (Theorem 4), the MSE (thus the convergence rate) blows up by  $(1 + \rho)$ . This result is strictly worse than ours. Consider the  $d$  dimensional vector  $X = (d^{0.9}, 1, 1, \dots, 1)$ . This vector is  $(1, 0.5d)$ -approximately sparse for large enough  $d$ , so their cost is  $O(d \log d)$ . However, according to our notion of sparsity, the Hoyer's sparseness is  $d^{-0.8}$ , and thus the communication cost is  $d^{0.2} \log d^{0.8}$ , which is asymptotically much better. On the other hand, for  $(\rho, k)$ -approximately sparse vector, its Hoyer's sparseness is at most  $(1 + \rho)^2 k/d$ . For the most interesting case  $\rho = O(1)$ , our results implies their bound up to a constant, but not vice versa. For large  $\rho$ , their cost is  $O(\rho k \log d)$  and MSE is  $\rho F_2/n^2$ . For our algorithm, we can use coordinate sampling as in [1] and achieve the same MSE with cost  $O(\rho k \log \frac{d}{k})$ , which also implies their result. To sum up, the result of [2] is implied by ours up to a constant, but there exist input instances such that our bound is asymptotically much better.

## 2 Missing Proofs

### 2.1 Proof of Lemma 2.1

**Lemma 2.1** (Lemma 2.1 restated). *Let  $\hat{v} = F\hat{u}$ , then  $E[\hat{v}] = v$  and  $E[\|\hat{v} - v\|_2^2] \leq F\|v\|_1$ . Moreover,  $E[|\hat{v}_i|] = |v_i|$ .*

*Proof.* One can verify that  $E[\hat{v}_j] = v_j$  (thus  $E[\hat{v}] = v$ ). Also,  $E[(\hat{u}_j - u_j)^2] = (u_j - \lfloor u_j \rfloor)(\lfloor u_j \rfloor + 1 - u_j)$ . For  $u_j \geq 0$ , this is bounded by  $u_j - \lfloor u_j \rfloor \leq u_j$ ; for  $u_j < 0$ , this is bounded by  $\lfloor u_j \rfloor + 1 - u_j \leq |u_j|$ . Thus, for any  $u_j$ ,  $E[(\hat{u}_j - u_j)^2] \leq |u_j|$ . We have

$$E[\|\hat{v} - v\|_2^2] = \sum_{j=1}^d E[(\hat{v}_j - v_j)^2] = F^2 \sum_{j=1}^d E[(\hat{u}_j - u_j)^2] \leq F^2 \sum_{j=1}^d |u_j| = F \sum_{j=1}^d |v_j| = F\|v\|_1.$$

For the second part, because scaling and rounding doesn't change the sign of each entry,

$$E[\text{sign}(v_i) \cdot |\hat{v}_i|] = E[\hat{v}_i] = v_i = \text{sign}(v_i) \cdot |v_i|,$$

which implies  $E[|\hat{v}_i|] = |v_i|$ . □

### 2.2 Proof of Lemma 3.4

**Lemma 2.2** (Lemma 3.4 restated). *For any  $\pi$  and let  $Y^\pi$  be its output, we have*

$$\sum_{j=1}^t \sum_{k=1}^b \sum_{i=1}^n [p_{ijk}^\pi (1 - p_{ijk}^\pi)] \leq n^2 \cdot E_{[X_1, \dots, X_n] \sim \mathcal{D}_\pi} [\|X - Y^\pi\|^2].$$

24 *Proof.* We need the following lemma, which is a result of the rectangle property and the fact that the  
 25 inputs sampled from  $\mathcal{D}$  are independent across all clients.

26 **Lemma 2.3.** *Let  $X_1, X_2, \dots, X_n$  be a random inputs sampled from  $\mathcal{D}_\pi$  for any particular transcript*  
 27  *$\pi$ . Then,  $X_1, X_2, \dots, X_n$  are still independent of each other.*

28 We have

$$\begin{aligned} \mathbb{E}_{[X_1, \dots, X_n] \sim \mathcal{D}_\pi} [\|X - Y^\pi\|^2] &= \mathbb{E}_{[X_1, \dots, X_n] \sim \mathcal{D}_\pi} \left[ \sum_{j=1}^t \left\| \frac{1}{n} \sum_{i=1}^n X_{ij} - Y_j^\pi \right\|^2 \right] \\ &= \frac{1}{n^2} \mathbb{E}_{[X_1, \dots, X_n] \sim \mathcal{D}_\pi} \left[ \sum_{j=1}^t \sum_{k=1}^b \left( \sum_{i=1}^n X_{ijk} - nY_{jk}^\pi \right)^2 \right] \\ &= \frac{1}{n^2} \sum_{j=1}^t \sum_{k=1}^b \mathbb{E}_{[X_1, \dots, X_n] \sim \mathcal{D}_\pi} \left[ \left( \sum_{i=1}^n X_{ijk} - nY_{jk}^\pi \right)^2 \right] \end{aligned}$$

29 By elementary calculus, for any fixed  $y$ , one can verify  $\mathbb{E}[(X - y)^2] \geq \mathbb{E}[(X - \mathbb{E}[X])^2] = \text{Var}[X]$   
 30 for any random variable  $X$ . Therefore, we have

$$\begin{aligned} \mathbb{E}_{[X_1, \dots, X_n] \sim \mathcal{D}_\pi} \left[ \left( \sum_{i=1}^n X_{ijk} - nY_{jk}^\pi \right)^2 \right] &\geq \text{Var}_{[X_1, \dots, X_n] \sim \mathcal{D}_\pi} \left[ \sum_{i=1}^n X_{ijk} \right] \\ &= \sum_{i=1}^n \text{Var}_{[X_1, \dots, X_n] \sim \mathcal{D}_\pi} [X_{ijk}] \\ &= \sum_{i=1}^n p_{ijk}^\pi (1 - p_{ijk}^\pi), \end{aligned}$$

where the first equality holds because, when  $[X_1, \dots, X_n] \sim \mathcal{D}_\pi$ ,  $X_{ijk}$ 's are independent across  $i$  (Lemma 2.3). Combined with the previous equation, we get

$$\mathbb{E}_{[X_1, \dots, X_n] \sim \mathcal{D}_\pi} [\|X - Y^\pi\|^2] \geq \frac{1}{n^2} \sum_{j=1}^t \sum_{k=1}^b \sum_{i=1}^n [p_{ijk}^\pi (1 - p_{ijk}^\pi)],$$

31 which completes the proof. □

## 32 References

- 33 [1] A. T. Suresh, F. X. Yu, S. Kumar, and H. B. McMahan. Distributed mean estimation with limited  
 34 communication. *ICML*, 2017.
- 35 [2] J. Wangni, J. Wang, J. Liu, and T. Zhang. Gradient sparsification for communication-efficient  
 36 distributed optimization. In *Advances in Neural Information Processing Systems 31*. 2018.
